# Supplementary material for: Predicting unfavorable long-term outcome in juvenile idiopathic arthritis: results from the Nordic cohort study
Source: Springer Nature journal article supplement (doi:10.1186/s13075-018-1571-6), 2018-05-03
Supplement: MOESM1 [file 15737044]

## Additional file 1

**Table S1** Characteristics of the 423 children in the Nordic juvenile idiopathic arthritis cohort at baseline

| <b>Baseline characteristics</b>           | <b>Total, N</b> | <b>Median (IQR), or n (%) GG</b> |
|-------------------------------------------|-----------------|----------------------------------|
| Gender female, n (%)                      | 423             | 280 (66.2)                       |
| Age at disease onset, years               | 423             | 5.5 (2.5-9.7)                    |
| First study visit, months                 | 423             | 7 (6-8)                          |
| Last study visit, months                  | 423             | 98 (95-102)                      |
| Time from onset to diagnosis, months      | 399             | 1.6 (0.5-3.3)                    |
| Cumulative active joint count             | 423             | 3 (1-6)                          |
| Physician's global assessment VAS         | 234             | 1.1 (0.5-3.0)                    |
| <b>Specific joint involvement, n (%)</b>  |                 |                                  |
| Hip joint                                 | 422             | 58 (13.7)                        |
| Ankle joint                               | 422             | 188 (44.6)                       |
| Tarsal joint                              | 422             | 36 (8.5)                         |
| Subtalar joint                            | 422             | 54 (12.8)                        |
| Wrist joint                               | 422             | 111 (26.3)                       |
| Finger joint                              | 422             | 131 (31.0)                       |
| Neck                                      | 422             | 34 (8.1)                         |
| Upper limb joints                         | 423             | 210 (49.7)                       |
| Lower limb joints                         | 423             | 381 (90.1)                       |
| <b>Symmetric joint involvement, n (%)</b> |                 |                                  |
| Hip joints                                | 422             | 23 (5.5)                         |
| Ankle joints                              | 422             | 97 (23.0)                        |
| Wrist joints                              | 422             | 66 (15.6)                        |
| Finger joints                             | 422             | 60 (14.2)                        |
| <b>JIA category, n (%)</b>                |                 |                                  |
| Oligoarticular                            | 423             | 227 (53.7)                       |
| Polyarticular RF negative                 | 423             | 94 (22.2)                        |
| Polyarticular RF positive                 | 423             | 4 (1.0)                          |
| Psoriatic arthritis                       | 423             | 6 (1.4)                          |
| Enthesitis-related arthritis (ERA)        | 423             | 34 (8.0)                         |
| Undifferentiated arthritis                | 423             | 58 (13.7)                        |
| ANA positive $\leq 6$ years <sup>a</sup>  | 410             | 72 (17.6)                        |
| <b>Patient-reported outcomes</b>          |                 |                                  |
| Patient's/parent's global assessment VAS  | 257             | 1.0 (0.2-3.0)                    |
| CHAQ score                                | 264             | 0.4 (0.0-1.0)                    |
| Pain VAS                                  | 253             | 1.1 (0.1-3.8)                    |
| Morning stiffness >15 minutes, n (%)      | 324             | 113 (34.9)                       |
| <b>Lab tests</b>                          |                 |                                  |
| ESR mm/hour                               | 342             | 14.0 (8.0-28.0)                  |
| CRP >10 mg/liter, n (%)                   | 338             | 73 (21.6)                        |
| ANA positive, n (%)                       | 410             | 115 (28.1)                       |
| RF positive, n (%)                        | 228             | 10 (4.4)                         |
| HLA-B27 positive, n (%)                   | 393             | 85 (21.6)                        |

Values are the median (Interquartile range, IQR), or n (%). <sup>a</sup>ANA-positive patients  $\leq 6$  years at disease onset, with oligoarticular, polyarticular RF negative, psoriatic arthritis or undifferentiated arthritis. VAS, visual analogue scale; CHAQ, Childhood Health Assessment Questionnaire; ESR, erythrocyte sedimentation rate for an increase in 10mm/hours; CRP, C-reactive protein; ANA, antinuclear antibody; RF, rheumatoid factor; HLA-B27, human leucocyte antigen.
