# Supplementary material for: Predicting unfavorable long-term outcome in juvenile idiopathic arthritis: results from the Nordic cohort study
Source: Springer Nature journal article supplement (doi:10.1186/s13075-018-1571-6), 2018-05-03
Supplement: MOESM2 [file 15737044]

## Additional file 2

**Table S2** Medications given before the baseline study visit

| <b>Medication</b>                | <b>Total N</b> | <b>N (%)</b> |
|----------------------------------|----------------|--------------|
| NSAIDs                           | 417            | 357 (85.6)   |
| Intrarticular steroid injections | 412            | 241 (58.0)   |
| Steroids systemic                | 417            | 38 (9.1)     |
| Methotrexate                     | 402            | 55 (13.7)    |
| Other DMARDs <sup>a</sup>        | 405            | 37 (9.1)     |
| Systemic treatment <sup>b</sup>  | 398            | 92 (23.1)    |
| Biologic treatment               | 422            | 0            |

<sup>a</sup>Other DMARDs; salazopyrin, hydroxychloroquine, gold, azatioprin, cyclosporin, cyclophosphamide

<sup>b</sup>Systemic treatment; DMARDs total and steroids
