# Supplementary material for: Predicting unfavorable long-term outcome in juvenile idiopathic arthritis: results from the Nordic cohort study
Source: Springer Nature journal article supplement (doi:10.1186/s13075-018-1571-6), 2018-05-03
Supplement: MOESM4 [file 15737044]

### Additional file 4

**Table S3** Baseline clinical characteristics as predictors of functional disability (CHAQ) in univariate logistic regression

| Baseline characteristics                   | Total<br><i>N</i> | CHAQ =0         | CHAQ>0          | OR<br>(95 % CI) | <i>p</i> |
|--------------------------------------------|-------------------|-----------------|-----------------|-----------------|----------|
| Gender female, n (%)                       | 340               | 142 (62.8)      | 84 (37.2)       | 0.5 (0.3-0.9)   | 0.013    |
| Age at disease onset, years                | 340               | 5.2 (2.5-9.4)   | 5.3 (2.3-9.7)   | 1.0 (1.0-1.1)   | 0.812    |
| Time from onset to diagnosis, months       | 325               | 1.3 (0.5-2.8)   | 1.9 (0.5-4.0)   | 1.0 (1.0-1.1)   | 0.106    |
| Cumulative active joint count              | 340               | 3 (1-6)         | 5 (2-9)         | 1.1 (1.0-1.1)   | 0.001    |
| Physician's global assessment VAS          | 199               | 1.0 (0.2-2.1)   | 2.0 (0.7-4.2)   | 2.6 (1.5-4.2)   | <0.001   |
| Polyarticular RF positive, n (%)           | 340               | 1 (25.0)        | 3 (75.0)        | 6.3 (0.7-61.6)  | 0.112    |
| Polyarticular RF negative, n (%)           | 340               | 48 (57.8)       | 35 (42.2)       | 1.7 (1.1-2.9)   | 0.034    |
| Oligoarticular, n (%)                      | 340               | 128 (72.7)      | 48(27.3)        | 0.6 (0.4-0.9)   | 0.029    |
| Psoriatic arthritis, n (%)                 | 340               | 4 (66.7)        | 2 (33.3)        | 1.0 (0.2-5.7)   | 0.971    |
| Enthesitis-related arthritis (ERA), n (%)  | 340               | 19 (76.0)       | 6 (24.0)        | 0.6 (0.2-1.6)   | 0.342    |
| Undifferentiated arthritis, n (%)          | 340               | 29 (63.0)       | 17 (37.0)       | 1.2 (0.7-2.4)   | 0.503    |
| ANA positive, ≤6 years, n (%) <sup>a</sup> | 340               | 36 (61.0)       | 23 (39.0)       | 1.4 (0.8-2.5)   | 0.237    |
| <b>Specific joint involvement, n (%)</b>   |                   |                 |                 |                 |          |
| Hip joint                                  | 339               | 34 (70.8)       | 14 (29.2)       | 0.8 (0.4-1.6)   | 0.601    |
| Ankle joint                                | 339               | 93 (61.2)       | 59 (38.8)       | 1.7 (1.1-2.7)   | 0.025    |
| Tarsal joint                               | 339               | 26 (78.8)       | 7 (21.2)        | 0.5 (0.2-1.3)   | 0.152    |
| Subtalar joint                             | 339               | 36 (76.6)       | 11 (23.4)       | 0.6 (0.3-1.2)   | 0.157    |
| Wrist joint                                | 339               | 46 (53.5)       | 40 (46.5)       | 2.3 (1.4-3.8)   | 0.001    |
| Finger joint                               | 339               | 54 (50.0)       | 54 (50.0)       | 3.1 (1.9-5.1)   | <0.001   |
| Neck                                       | 339               | 15 (53.6)       | 13 (46.4)       | 1.9 (0.9-4.2)   | 0.104    |
| Upper limb joints                          | 340               | 97 (56.7)       | 74 (43.3)       | 2.7 (1.7-4.4)   | <0.001   |
| Lower limb joints                          | 340               | 202 (66.2)      | 103 (33.8)      | 1.7 (0.8-3.9)   | 0.197    |
| <b>Symmetric involvement, n (%)</b>        |                   |                 |                 |                 |          |
| Hip joints                                 | 339               | 13 (68.4)       | 6 (31.6)        | 1.0 (0.4-2.6)   | 0.934    |
| Ankle joints                               | 339               | 47 (57.3)       | 35 (42.7)       | 1.8 (1.1-3.0)   | 0.024    |
| Wrist joints                               | 339               | 25 (48.1)       | 27 (51.9)       | 2.7 (1.5-4.8)   | 0.001    |
| Finger joints                              | 339               | 18 (36.7)       | 31 (63.3)       | 4.6 (2.4-8.7)   | <0.001   |
| <b>Patient-reported outcomes</b>           |                   |                 |                 |                 |          |
| Patient's/parent's global assessment VAS   | 223               | 0.8 (0.0-2.2)   | 2.0 (1.0-3.4)   | 2.2 (1.4-3.5)   | <0.001   |
| CHAQ score                                 | 228               | 0.1 (0.0-0.9)   | 0.6 (0.0-1.4)   | 2.0 (1.3-3.0)   | 0.001    |
| Pain VAS                                   | 220               | 0.5 (0.0-2.5)   | 2.7 (1.0-5.0)   | 3.0 (1.9-4.8)   | <0.001   |
| Morning stiffness >15 minutes, n (%)       | 265               | 38 (40.4)       | 56 (59.6)       | 5.2 (3.0-8.9)   | <0.001   |
| <b>Lab tests</b>                           |                   |                 |                 |                 |          |
| ESR mm/hour                                | 275               | 14.0 (8.0-25.0) | 14.5 (8.0-39.0) | 1.1 (1.0-1.2)   | 0.142    |
| CRP >10 mg/liter, n (%)                    | 275               | 42 (64.6)       | 23 (35.4)       | 1.2 (0.7-2.1)   | 0.552    |
| ANA positive, n (%)                        | 333               | 57 (59.4)       | 39 (40.6)       | 1.7 (1.0-2.7)   | 0.043    |
| RF positive, n (%)                         | 184               | 5 (62.5)        | 3 (37.5)        | 1.0 (0.2-4.2)   | 0.974    |
| HLA-B27 positive, n (%)                    | 323               | 45 (65.2)       | 24 (34.8)       | 1.1 (0.6-1.9)   | 0.789    |

Values are the median (Interquartile range, IQR), or n (%). <sup>a</sup>ANA-positive patients ≤6 years at disease onset, with oligoarticular, polyarticular RF negative, psoriatic or undifferentiated arthritis. CHAQ, Childhood Health Assessment Questionnaire; OR, Odds ratio; CI, Confidence interval; VAS, visual analogue scale; ESR, erythrocyte sedimentation rate for an increase in 10mm/hours; CRP, C-reactive protein; ANA, antinuclear antibody; RF, rheumatoid factor; HLA-B27, human leucocyte antigen.
