# Supplementary material for: Predicting unfavorable long-term outcome in juvenile idiopathic arthritis: results from the Nordic cohort study
Source: Springer Nature journal article supplement (doi:10.1186/s13075-018-1571-6), 2018-05-03
Supplement: MOESM6 [file 15737044]

Additional file 6

**Table S5** Baseline clinical characteristics as predictors of joint damage (JADI-A) in univariate logistic regression

| Baseline characteristics                   | Total<br>N | JADI-A=0        | JADI-A>0        | OR<br>(95 % CI) | p      |
|--------------------------------------------|------------|-----------------|-----------------|-----------------|--------|
| Gender female, n (%)                       | 216        | 126 (85.7)      | 21 (14.3)       | 0.8 (0.3-1.9)   | 0.589  |
| Age at disease onset, years                | 216        | 5.1 (2.4-9.7)   | 8.3 (5.9-10.9)  | 1.1 (1.0-1.2)   | 0.032  |
| Time from onset to diagnosis, months       | 205        | 1.5 (0.5-3.1)   | 2.2 (0.7-5.7)   | 1.1 (1.0-1.1)   | 0.093  |
| Cumulative active joint count              | 216        | 3 (1-7)         | 6 (3-14)        | 1.1(1.0-1.2)    | <0.001 |
| Physician's global assessment VAS          | 193        | 1.0 (0.5-2.8)   | 2.5 (0.9-4.6)   | 2.0 (1.1-3.7)   | 0.022  |
| Polyarticular RF positive, n (%)           | 216        | 0               | 2 (100)         | NA              | NA     |
| Polyarticular RF negative, n (%)           | 216        | 42 (77.8)       | 12 (22.2)       | 2.4 (1.1-5.5)   | 0.032  |
| Oligoarticular, n (%)                      | 216        | 101 (91.0)      | 10 (9.0)        | 0.4 (0.2-1.0)   | 0.054  |
| Psoriatic arthritis, n (%)                 | 216        | 1 (100)         | 0               | NA              | NA     |
| Enthesitis-related arthritis (ERA), n (%)  | 216        | 17 (89.5)       | 2 (10.5)        | 0.7 (0.2-3.4)   | 0.699  |
| Undifferentiated arthritis, n (%)          | 216        | 26 (89.7)       | 3 (10.3)        | 0.7 (0.2-2.5)   | 0.602  |
| ANA positive, ≤6 years, n (%) <sup>a</sup> | 216        | 42 (95.5)       | 2 (4.5)         | 0.3 (0.1-1.1)   | 0.070  |
| <b>Specific joint involvement, n (%)</b>   |            |                 |                 |                 |        |
| Hip joint                                  | 215        | 26 (83.9)       | 5 (16.1)        | 1.3 (0.4-3.7)   | 0.642  |
| Ankle joint                                | 215        | 87 (86.1)       | 14 (13.9)       | 1.1 (0.5-2.3)   | 0.880  |
| Tarsal joint                               | 215        | 9 (75.0)        | 3 (25)          | 2.3 (0.6-8.9)   | 0.241  |
| Subtalar joint                             | 215        | 8 (80.0)        | 2 (20.0)        | 1.6 (0.3-8.2)   | 0.541  |
| Wrist joint                                | 215        | 49 (79.0)       | 13 (21.0)       | 2.3 (1.0-5.1)   | 0.045  |
| Finger joint                               | 215        | 52 (72.2)       | 20 (27.8)       | 5.7 (2.4-13.4)  | <0.001 |
| Neck                                       | 215        | 15 (62.5)       | 9 (37.5)        | 5.1 (2.0-13.2)  | 0.001  |
| Upper limb joints                          | 216        | 93 (80.2)       | 23 (19.8)       | 3.9 (1.5-9.9)   | 0.005  |
| Lower limb joints                          | 216        | 174 (86.1)      | 28 (13.9)       | 2.1 (0.3-16.6)  | 0.485  |
| <b>Symmetric involvement, n (%)</b>        |            |                 |                 |                 |        |
| Hip joints                                 | 215        | 12 (80.0)       | 3 (20.0)        | 1.7 (0.4-6.3)   | 0.448  |
| Ankle joints                               | 215        | 54 (83.1)       | 11 (16.9)       | 1.5 (0.7-3.4)   | 0.334  |
| Wrist joints                               | 215        | 31 (75.6)       | 10 (24.4)       | 2.6 (1.1-6.2)   | 0.027  |
| Finger joints                              | 215        | 24 (64.9)       | 13 (35.1)       | 5.5 (2.3-12.8)  | <0.001 |
| <b>Patient-reported outcomes</b>           |            |                 |                 |                 |        |
| Patient's/parent's global assessment VAS   | 195        | 1.0 (0.0-3.1)   | 1.8 (0.9-3.3)   | 1.4 (0.8-2.5)   | 0.209  |
| CHAQ score                                 | 199        | 0.3 (0.0-0.9)   | 0.6 (0.0-1.4)   | 1.9 (1.0-3.4)   | 0.037  |
| Pain VAS                                   | 192        | 1.0 (0.0-3.8)   | 1.5 (0.3-4.3)   | 1.3 (0.7-2.3)   | 0.422  |
| Morning stiffness >15 minutes, n (%)       | 208        | 74 (83.0)       | 15 (17.0)       | 1.5 (0.7-3.3)   | 0.297  |
| <b>Lab tests</b>                           |            |                 |                 |                 |        |
| ESR mm/hour                                | 167        | 13.0 (7.0-22.0) | 15.0 (8.5-26.5) | 1.1(0.9-1.3)    | 0.458  |
| CRP >10 mg/liter, n (%)                    | 169        | 28 (77.8)       | 8 (22.2)        | 1.7 (0.7-4.3)   | 0.253  |
| ANA positive, n (%)                        | 209        | 58 (87.9)       | 8 (12.1)        | 0.8 (0.4-2.0)   | 0.713  |
| RF positive, n (%)                         | 159        | 4 (66.7)        | 2 (33.3)        | 2.8 (0.5-16.3)  | 0.246  |
| HLA-B27 positive, n (%)                    | 214        | 45 (86.5)       | 7 (13.5)        | 1.0 (0.4-2.6)   | 0.926  |

Values are the median (Interquartile range, IQR), or n (%). <sup>a</sup>ANA-positive patients ≤6 years at disease onset, with oligoarticular, polyarticular RF negative, psoriatic or undifferentiated arthritis. JADI-A, Juvenile Arthritis Damage Index-Articular; OR, Odds ratio; CI, Confidence interval; VAS, visual analogue scale; CHAQ, Childhood Health Assessment Questionnaire; ESR, erythrocyte sedimentation rate for an increase in 10mm/hours; CRP, C-reactive protein; ANA, antinuclear antibody; RF, rheumatoid factor; HLA-B27, human leucocyte antigen. NA, not applicable.
